# Supplementary material for: Ena drives invasive macrophage migration in Drosophila embryos
Source: PubMed Central journal article supplement — Dis Model Mech. 2010 Nov 2;4(1):126–34. doi: 10.1242/dmm.005694 (PMC3008967; doi:10.1242/dmm.005694), 2010-11-02
Supplement: supp_005694_DMM005694TableS1.pdf [file supp_005694_DMM005694TableS1.pdf]

| Condition                     |         | Rate of Protrusion ( $\mu\text{m}/\text{min}$ ) | Persistence of Protrusion (mins) | Rate of Retraction ( $\mu\text{m}/\text{min}$ ) | Persistence of Retraction (mins) | Frequency of Retraction Events (events/min) |
|-------------------------------|---------|-------------------------------------------------|----------------------------------|-------------------------------------------------|----------------------------------|---------------------------------------------|
| in vivo                       | average | 5.3                                             | 0.32                             | 3.3                                             | 0.44                             | 1.0                                         |
|                               | p value | n/a                                             | n/a                              | n/a                                             | n/a                              | n/a                                         |
| in vitro                      | average | 10                                              | 0.0076                           | 9.0                                             | 0.32                             | 1.6                                         |
|                               | p value | $1.1 \times 10^{-5}$                            | 0.0077                           | $1.8 \times 10^{-5}$                            | 0.020                            | 0.0052                                      |
| in vitro with methylcellulose | average | 3.9                                             | 0.26                             | 3.3                                             | 0.35                             | 1.1                                         |
|                               | p value | 0.086                                           | 0.085                            | 0.93                                            | 0.08                             | 0.85                                        |
